# Supplementary material for: Juxtanodin is an intrinsically disordered F-actin-binding protein
Source: PubMed Central journal article supplement — Sci Rep. 2012 Nov 29;2:899. doi: 10.1038/srep00899 (PMC3509349; doi:10.1038/srep00899), 2012-11-29
Supplement: srep00899-s1.pdf [file srep00899-s1.pdf]

## SUPPLEMENTARY INFORMATION

### **Juxtanodin is an intrinsically disordered F-actin binding protein**

Salla Ruskamo <sup>1,2</sup>, Maryna Chukhlieb <sup>1,2</sup>, Juha Vahokoski <sup>1</sup>, Saligram Prabhakar Bhargav <sup>1</sup>, Fengyi Liang <sup>3</sup>, Inari Kursula <sup>4</sup>, Petri Kursula <sup>1,2,4,\*</sup>

<sup>1</sup> Department of Biochemistry, University of Oulu, Oulu, Finland

<sup>2</sup> Biocenter Oulu, University of Oulu, Oulu, Finland

<sup>3</sup> Department of Anatomy, Yong Loo Lin School of Medicine, National University of Singapore, Singapore

<sup>4</sup> Centre for Structural Systems Biology - Helmholtz Centre for Infection Research (CSSB-HZI); Department of Chemistry, University of Hamburg; and German Electron Synchrotron (DESY), Hamburg, Germany

(a)

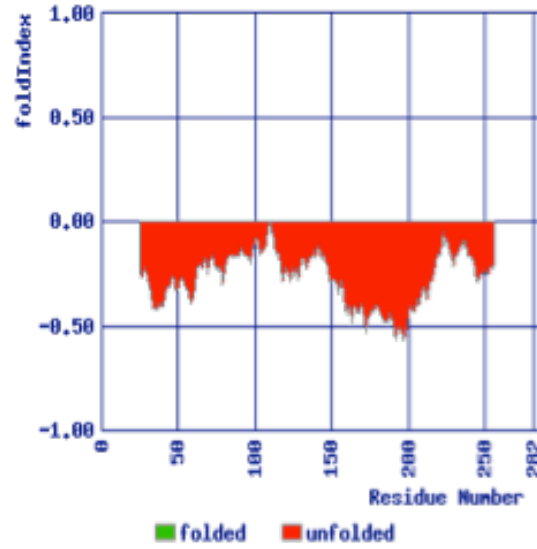

(b)

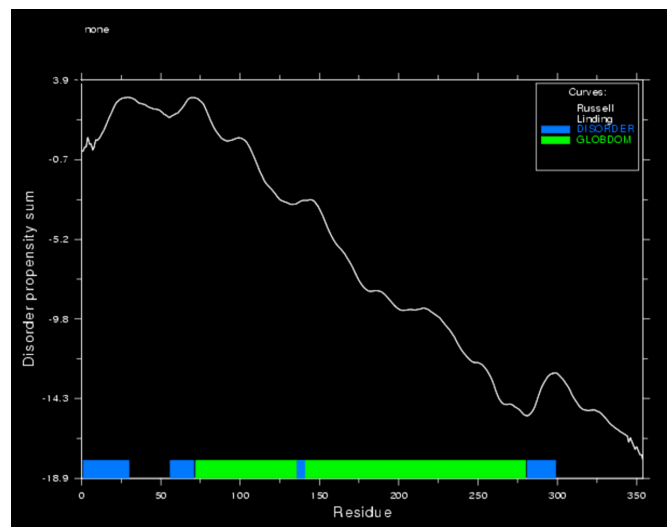

(c)

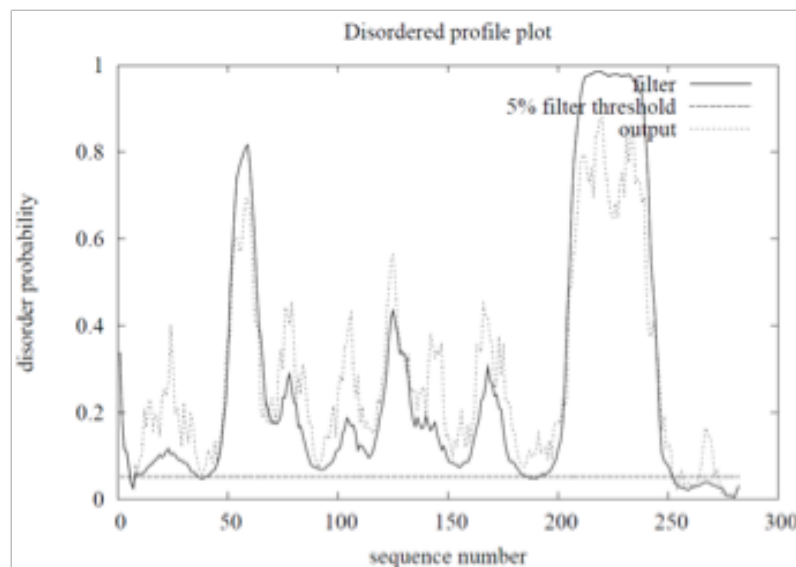

Supplementary figure 1. Additional disorder predictors. (a) FoldIndex predicts no folded regions in juxtalin. (b) GlobPlot suggests the presence of a globular domain (green) in addition to disordered regions (blue). (c) DisoPred predicts rather short segments of disorder, mainly between residues 50-70, 120-130, 160-180, and 200-250.
